# Supplementary material
Source: publisher site journal article supplement (https://www.spandidos-publications.com/7134/downloadSupplementary)
Supplement: Supplementary file 1 [file downloadSupplementary]

Table SI. Comparison of receiver operating characteristic curves of eosinophil percentage, eosinophil count and Logit(P) with the monocyte count.

| Parameters                               | Difference between areas | Standard error | 95% Confidence interval | P-value |
|------------------------------------------|--------------------------|----------------|-------------------------|---------|
| Eosinophil percentage vs. monocyte count | 0.086                    | 0.039          | 0.009-0.162             | 0.028   |
| Eosinophil count vs. monocyte count      | 0.092                    | 0.037          | 0.020-0.163             | 0.012   |
| Logit(P) vs. monocyte count              | 0.118                    | 0.029          | 0.061-0.176             | <0.001  |
